# Supplementary material for: Whey peptides exacerbate body weight gain and perturb systemic glucose and tissue lipid metabolism in male high-fat fed mice
Source: Royal Society of Chemistry journal article supplement (doi:10.1039/d0fo02610g), 2021-01-01
Supplement: d0fo02610g1.pdf [file d0fo02610g1.pdf]

**Supplemental information:**

**Whey peptides exacerbate body weight gain and perturb systemic glucose and tissue lipid metabolism in male high-fat fed mice**

Kenneth D'Souza<sup>1</sup>, Caleb Acquah<sup>2</sup>, Angella Mercer<sup>1</sup>, Yadab Paudel<sup>1</sup>, Thomas Pulinilkunnil<sup>1</sup>, Chibuike C. Udenigwe<sup>2</sup> and Petra C. Kienesberger<sup>1\*</sup>

<sup>1</sup>Department of Biochemistry and Molecular Biology, Faculty of Medicine, Dalhousie University, Dalhousie Medicine New Brunswick, Saint John, New Brunswick E2L 4L5 Canada

<sup>2</sup>School of Nutrition Sciences, Faculty of Health Sciences, University of Ottawa, Ottawa, Ontario K1H 8M5, Canada

\*Correspondence: [pkienesb@dal.ca](mailto:pkienesb@dal.ca); Tel.: +1-506-636-6971

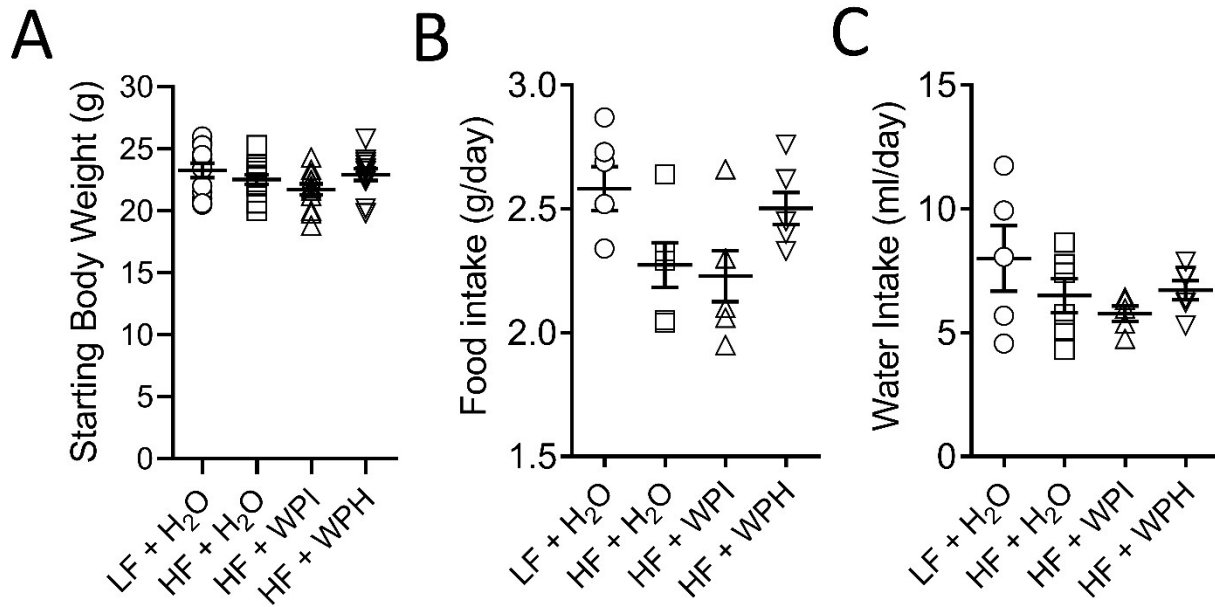

**Supplemental Figure 1: WPI and WPH consumption does not influence food and water intake.** Starting body weight (A) and food (B) and water (C) intake in male LF- and HF-fed C57Bl6/J mice. For (A) n=12 and (B-C) n= 5-6.

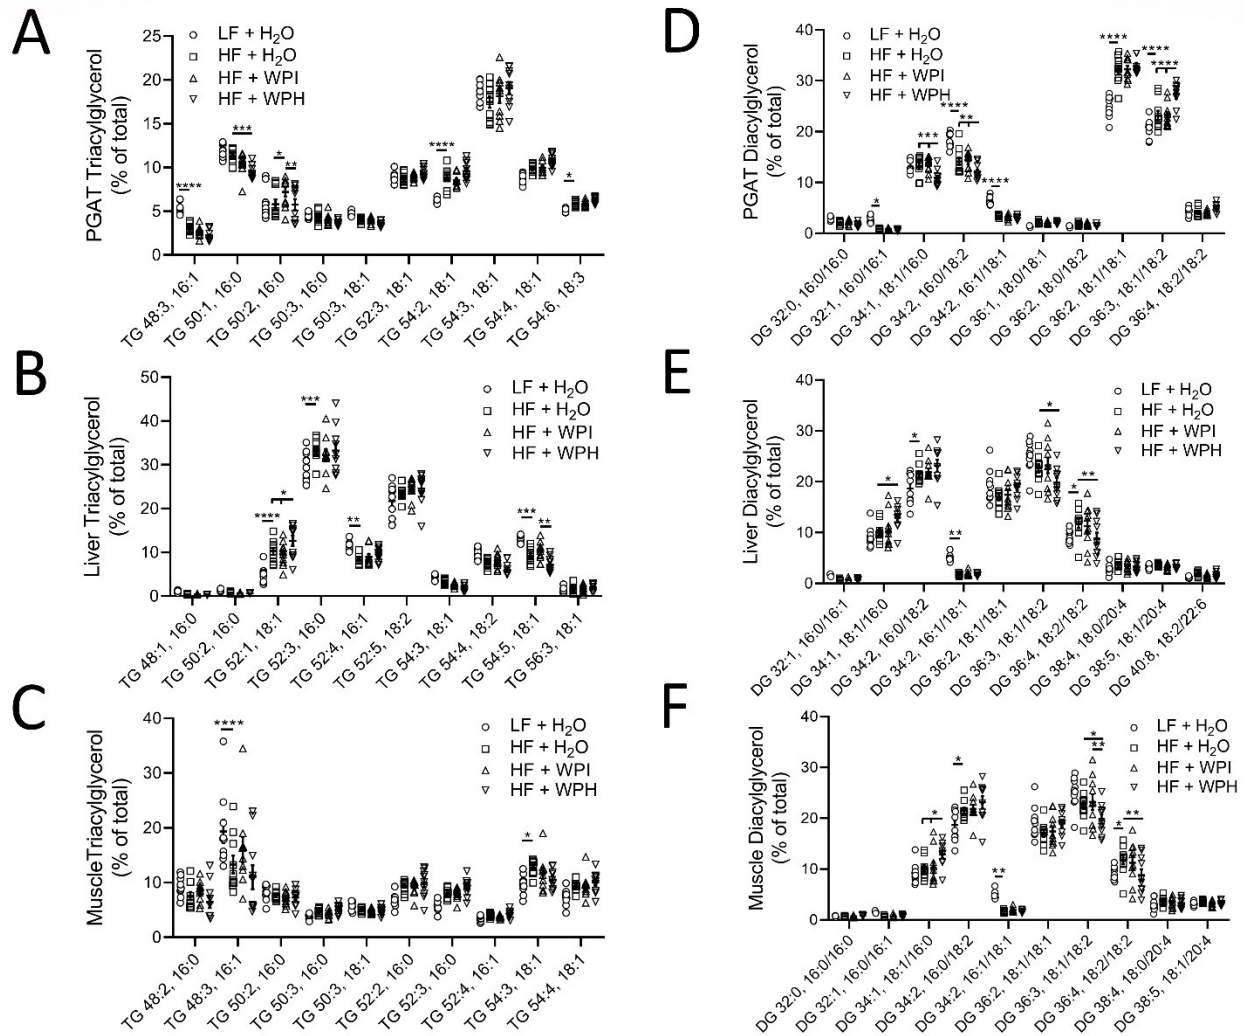

**Supplemental Figure 2. Acyl chain compositions of triacylglycerol and diacylglycerol species in PGAT, liver and muscle.** Lipid species were measured using targeted lipidomics in male LF- and HF-fed C57Bl6/J mice (n=10). Acyl chain composition of triacylglycerols in PGAT (A), liver (B) and gastrocnemius muscle (C). Acyl chain composition of diacylglycerols in PGAT (D), liver (E) and gastrocnemius muscle (F). Statistical analysis was performed using a two-way ANOVA followed by a Tukey's multiple comparison test. \*P < 0.05, \*\*P < 0.01, \*\*\*P < 0.001 and \*\*\*\*P < 0.0001 as indicated.
